# Supplementary material for: Saccharides as Particulate Matter Tracers of Biomass Burning: A Review
Source: MDPI journal article supplement (doi:10.3390/ijerph19074387), 2022-04-06
Supplement: s1 [file s1]

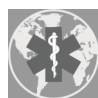

## SACCHARIDES AS PARTICULATE MATTER TRACERS OF BIOMASS BURNING: A REVIEW

**Table S1:** Saccharide compounds identified in the research articles reviewed. Concentrations are expressed in ng/m<sup>3</sup>.

| Compounds           | Location | Source              | Fraction sampled  | Period           | Technique | Conc.  | Reference |
|---------------------|----------|---------------------|-------------------|------------------|-----------|--------|-----------|
| <i>Levogluconan</i> |          |                     |                   |                  |           |        |           |
|                     | China    | -                   | PM <sub>2.5</sub> | Summer           | GC-MS     | 89     | [55]      |
|                     | Thailand | -                   | PM <sub>2.5</sub> | Winter-Spring    | IC-PAD    | 1222   | [57]      |
|                     | Nepal    | suburban background | PM <sub>2.5</sub> | Spring           | GC-MS     | 1230   | [36]      |
|                     | China    | urban back-ground   | PM <sub>2.5</sub> | Autumn           | GC-MS     | 110    | [189]     |
|                     | China    | urban back-ground   | PM <sub>2.5</sub> | Winter           | GC-MS     | 189    | [189]     |
|                     | China    | urban back-ground   | PM <sub>2.5</sub> | Spring           | GC-MS     | 63.4   | [189]     |
|                     | China    | urban back-ground   | PM <sub>2.5</sub> | Summer           | GC-MS     | 12.4   | [189]     |
|                     | China    | rural back-ground   | PM <sub>2.5</sub> | Summer           | HPAEC-PAD | 205.94 | [29]      |
|                     | China    | urban back-ground   | PM <sub>2.5</sub> | Summer           | HPAEC-PAD | 56.37  | [29]      |
|                     | USA      | rural back-ground   | PM <sub>2.5</sub> | Autumn to Summer | GC-MS     | 38.4   | [31]      |
|                     | USA      | urban background    | PM <sub>2.5</sub> | Winter to Spring | GC-MS     | 30.3   | [31]      |
|                     | India    | urban background    | PM <sub>10</sub>  | Spring           | GC-MS     | 44.4   | [190]     |
|                     | India    | rural background    | PM <sub>1</sub>   | Autumn           | GC-MS     | 1411   | [54]      |
|                     | China    | urban background    | PM <sub>2.5</sub> | May-June         | HPAEC-PAD | 73     | [191]     |
|                     | China    | urban background    | PM <sub>2.5</sub> | Nov-Dec          | HPAEC-PAD | 272    | [191]     |
|                     | China    | suburban background | PM <sub>2.5</sub> | May-June         | HPAEC-PAD | 8      | [191]     |
|                     | China    | suburban background | PM <sub>2.5</sub> | November         | HPAEC-PAD | 181    | [191]     |
|                     | India    | rural background    | PM <sub>2.5</sub> | Autumn           | IC-PAD    | 2258   | [128]     |
|                     | China    | urban background    | PM <sub>2.5</sub> | Autumn           | GC-MS     | 47.2   | [122]     |
|                     | China    | urban background    | PM <sub>2.5</sub> | Winter           | GC-MS     | 194.6  | [122]     |
|                     | China    | urban background    | PM <sub>2.5</sub> | Spring           | GC-MS     | 57.4   | [122]     |
|                     | China    | urban background    | PM <sub>2.5</sub> | Summer           | GC-MS     | 26.2   | [122]     |
|                     | China    | urban background    | PM <sub>2.5</sub> | Spring           | HPAEC-PAD | 66     | [130]     |
|                     | China    | urban background    | PM <sub>2.5</sub> | Summer           | HPAEC-PAD | 28     | [130]     |

|                |                    |                   |                    |                   |       |       |
|----------------|--------------------|-------------------|--------------------|-------------------|-------|-------|
| China          | urban background   | PM <sub>2.5</sub> | Autumn             | HPAEC-PAD         | 229   | [130] |
| China          | urban background   | PM <sub>2.5</sub> | Winter             | HPAEC-PAD         | 161   | [130] |
| Brazil         | pasture site       | aerosol           | Autumn             | GC-MS             | 2460  | [53]  |
| Brazil         | forest site        | aerosol           | Autumn             | GC-MS             | 1180  | [53]  |
| Italy          | urban background   | aerosol           | Spring             | IC-MS             | -     | [192] |
| Arctic region  | rural background   | PM <sub>10</sub>  | Spring             | IC-MS             | 0.3   | [193] |
| China          | rural background   | PM <sub>10</sub>  | Autumn to Winter   | HPAEC-PAD         | 231.9 | [127] |
| Serbia         | urban background   | aerosol           | Summer to Winter   | HPAEC-MS, HPLC-MS | 424.9 | [39]  |
| Italy          | urban site         | PM <sub>2.5</sub> | Summer             | GC-MS             | 2.2   | [123] |
| Italy          | urban site         | PM <sub>2.5</sub> | Autumn             | GC-MS             | 288.9 | [123] |
| Italy          | urban site         | PM <sub>2.5</sub> | Winter             | GC-MS             | 259.4 | [123] |
| Italy          | urban site         | PM <sub>2.5</sub> | Spring             | GC-MS             | 13.5  | [123] |
| Italy          | rural background   | PM <sub>2.5</sub> | Summer             | GC-MS             | <LOD  | [123] |
| Italy          | rural background   | PM <sub>2.5</sub> | Autumn             | GC-MS             | 233.2 | [123] |
| Italy          | rural background   | PM <sub>2.5</sub> | Winter             | GC-MS             | 252.9 | [123] |
| Italy          | rural background   | PM <sub>2.5</sub> | Spring             | GC-MS             | 3.8   | [123] |
| Greece         | rural coastal site | PM <sub>10</sub>  | yearly             | HPAEC-PAD         | 12.6  | [194] |
| Brazil         | forest site        | PM <sub>2.5</sub> | Winter             | GC-MS             | 14.99 | [195] |
| Brazil         | forest site        | PM <sub>10</sub>  | Winter             | GC-MS             | 1.97  | [195] |
| China          | forest background  | PM <sub>2.5</sub> | Summer (daytime)   | GC-MS             | 39    | [56]  |
| China          | forest background  | PM <sub>2.5</sub> | Summer (nighttime) | GC-MS             | 5.3   | [56]  |
| Brazil         | urban site         | PM <sub>10</sub>  | Winter             | GC-MS             | 260   | [139] |
| Brazil         | urban site         | PM <sub>10</sub>  | Winter             | GC-MS             | 400   | [139] |
| Japan          | marine site        | aerosol           | Winter             | GC-MS             | 1.35  | [178] |
| Japan          | marine site        | aerosol           | Spring             | GC-MS             | 0.79  | [178] |
| Japan          | marine site        | aerosol           | Summer             | GC-MS             | 0.37  | [178] |
| Japan          | marine site        | aerosol           | Autumn             | GC-MS             | 0.18  | [178] |
| China          | urban area         | PM <sub>1</sub>   | Summer             | HPAEC-PAD         | 14.7  | [196] |
| China          | urban area         | PM <sub>2.5</sub> | Summer             | HPAEC-PAD         | 20.8  | [196] |
| Taiwan         | urban area         | PM <sub>2.5</sub> | Autumn             | HPAEC-PAD         | 1.03  | [177] |
| Czech Republic | suburban area      | aerosol           | Winter             | NMR               | -     | [197] |
| Czech Republic | suburban area      | aerosol           | Summer             | NMR               | -     | [197] |

*Mannosan*

|          |                     |                   |                   |                   |      |       |
|----------|---------------------|-------------------|-------------------|-------------------|------|-------|
| China    | -                   | PM <sub>2.5</sub> | Summer            | GC-MS             | 4.4  | [55]  |
| Thailand | -                   | PM <sub>2.5</sub> | Winter-Spring     | IC-PAD            | 65   | [57]  |
| China    | urban background    | PM <sub>2.5</sub> | Autumn            | GC-MS             | 10.5 | [189] |
| China    | urban background    | PM <sub>2.5</sub> | Winter            | GC-MS             | 39.2 | [189] |
| China    | urban background    | PM <sub>2.5</sub> | Spring            | GC-MS             | 12.2 | [189] |
| China    | urban background    | PM <sub>2.5</sub> | Summer            | GC-MS             | 1.41 | [189] |
| China    | rural background    | PM <sub>2.5</sub> | Summer            | HPAEC-PAD         | 19.8 | [29]  |
| China    | urban background    | PM <sub>2.5</sub> | Summer            | HPAEC-PAD         | 10.3 | [29]  |
| India    | urban background    | PM <sub>10</sub>  | Spring            | GC-MS             | 7.7  | [190] |
| India    | rural background    | PM <sub>1</sub>   | Autumn            | GC-MS             | 19.1 | [54]  |
| China    | urban background    | PM <sub>2.5</sub> | May-June          | HPAEC-PAD         | 6    | [191] |
| China    | urban background    | PM <sub>2.5</sub> | November-December | HPAEC-PAD         | 17   | [191] |
| China    | suburban background | PM <sub>2.5</sub> | May-June          | HPAEC-PAD         | <LOD | [191] |
| China    | suburban background | PM <sub>2.5</sub> | November          | HPAEC-PAD         | 10   | [191] |
| China    | urban background    | PM <sub>2.5</sub> | Autumn            | GC-MS             | 3.8  | [122] |
| China    | urban background    | PM <sub>2.5</sub> | Winter            | GC-MS             | 15.3 | [122] |
| China    | urban background    | PM <sub>2.5</sub> | Spring            | GC-MS             | 3.9  | [122] |
| China    | urban background    | PM <sub>2.5</sub> | Summer            | GC-MS             | 2.3  | [122] |
| China    | urban background    | PM <sub>2.5</sub> | Spring            | HPAEC-PAD         | 15   | [130] |
| China    | urban background    | PM <sub>2.5</sub> | Summer            | HPAEC-PAD         | 12   | [130] |
| China    | urban background    | PM <sub>2.5</sub> | Autumn            | HPAEC-PAD         | 21   | [130] |
| China    | urban background    | PM <sub>2.5</sub> | Winter            | HPAEC-PAD         | 23   | [130] |
| Brazil   | pasture site        | aerosol           | Autumn            | GC-MS             | 126  | [53]  |
| Brazil   | forest site         | aerosol           | Autumn            | GC-MS             | 49.5 | [53]  |
| Italy    | urban background    | aerosol           | Spring            | IC-MS             | -    | [192] |
| China    | rural background    | PM <sub>10</sub>  | Autumn to Winter  | HPAEC-PAD         | 21.8 | [127] |
| Serbia   | urban background    | aerosol           | Summer to Winter  | HPAEC-MS, HPLC-MS | 56.3 | [39]  |
| Italy    | urban site          | PM <sub>2.5</sub> | Summer            | GC-MS             | <LOD | [123] |
| Italy    | urban site          | PM <sub>2.5</sub> | Autumn            | GC-MS             | 63.5 | [123] |

|        |                    |                   |                    |           |       |       |
|--------|--------------------|-------------------|--------------------|-----------|-------|-------|
| Italy  | urban site         | PM <sub>2.5</sub> | Winter             | GC-MS     | 63.6  | [123] |
| Italy  | urban site         | PM <sub>2.5</sub> | Spring             | GC-MS     | 2     | [123] |
| Italy  | rural back-ground  | PM <sub>2.5</sub> | Summer             | GC-MS     | <LOD  | [123] |
| Italy  | rural back-ground  | PM <sub>2.5</sub> | Autumn             | GC-MS     | 47    | [123] |
| Italy  | rural back-ground  | PM <sub>2.5</sub> | Winter             | GC-MS     | 61.5  | [123] |
| Italy  | rural back-ground  | PM <sub>2.5</sub> | Spring             | GC-MS     | 0.7   | [123] |
| Greece | rural coastal site | PM <sub>10</sub>  | yearly             | HPAEC-PAD | 1.53  | [194] |
| Brazil | forest site        | PM <sub>2.5</sub> | Winter             | GC-MS     | 0.28  | [195] |
| Brazil | forest site        | PM <sub>10</sub>  | Winter             | GC-MS     | 0.08  | [195] |
| China  | forest background  | PM <sub>2.5</sub> | Summer (daytime)   | GC-MS     | -     | [56]  |
| China  | forest back-ground | PM <sub>2.5</sub> | Summer (nighttime) | GC-MS     | -     | [56]  |
| Brazil | urban site         | PM <sub>10</sub>  | Winter             | GC-MS     | 19    | [139] |
| Brazil | urban site         | PM <sub>10</sub>  | Winter             | GC-MS     | 29.1  | [139] |
| Japan  | marine site        | aerosol           | Winter             | GC-MS     | 0.18  | [178] |
| Japan  | marine site        | aerosol           | Spring             | GC-MS     | 0.18  | [178] |
| Japan  | marine site        | aerosol           | Summer             | GC-MS     | 0.054 | [178] |
| Japan  | marine site        | aerosol           | Autumn             | GC-MS     | 0.055 | [178] |
| Taiwan | urban area         | PM <sub>2.5</sub> | Autumn             | HPAEC-PAD | 0.17  | [177] |

#### Galactosan

|          |                   |                   |               |           |       |       |
|----------|-------------------|-------------------|---------------|-----------|-------|-------|
| China    | -                 | PM <sub>2.5</sub> | Summer        | GC-MS     | 10.6  | [55]  |
| Thailand | -                 | PM <sub>2.5</sub> | Winter-Spring | IC-PAD    | 14    | [57]  |
| China    | urban back-ground | PM <sub>2.5</sub> | Autumn        | GC-MS     | 8.67  | [189] |
| China    | urban back-ground | PM <sub>2.5</sub> | Winter        | GC-MS     | 25.6  | [189] |
| China    | urban back-ground | PM <sub>2.5</sub> | Spring        | GC-MS     | 5.82  | [189] |
| China    | urban back-ground | PM <sub>2.5</sub> | Summer        | GC-MS     | 0.72  | [189] |
| China    | rural back-ground | PM <sub>2.5</sub> | Summer        | HPAEC-PAD | 17.47 | [29]  |
| China    | urban back-ground | PM <sub>2.5</sub> | Summer        | HPAEC-PAD | 7.49  | [29]  |
| India    | urban back-ground | PM <sub>10</sub>  | Spring        | GC-MS     | 6.08  | [190] |
| India    | rural back-ground | PM <sub>1</sub>   | Autumn        | GC-MS     | 5.52  | [54]  |
| China    | urban back-ground | PM <sub>2.5</sub> | Autumn        | GC-MS     | 2.2   | [122] |
| China    | urban back-ground | PM <sub>2.5</sub> | Winter        | GC-MS     | 8.9   | [122] |

|        |                    |                   |                    |                   |       |       |
|--------|--------------------|-------------------|--------------------|-------------------|-------|-------|
| China  | urban back-ground  | PM <sub>2.5</sub> | Spring             | GC-MS             | 2.2   | [122] |
| China  | urban back-ground  | PM <sub>2.5</sub> | Summer             | GC-MS             | 1     | [122] |
| Brazil | pasture site       | aerosol           | Autumn             | GC-MS             | 55.4  | [53]  |
| Brazil | forest site        | aerosol           | Autumn             | GC-MS             | 22.7  | [53]  |
| Italy  | urban back-ground  | aerosol           | Spring             | IC-MS             | -     | [192] |
| China  | rural back-ground  | PM <sub>10</sub>  | Autumn to Winter   | HPAEC-PAD         | 5.5   | [127] |
| Serbia | urban back-ground  | aerosol           | Summer to Winter   | HPAEC-MS, HPLC-MS | 25.3  | [39]  |
| Italy  | urban site         | PM <sub>2.5</sub> | Summer             | GC-MS             | <LOD  | [123] |
| Italy  | urban site         | PM <sub>2.5</sub> | Autumn             | GC-MS             | 29.8  | [123] |
| Italy  | urban site         | PM <sub>2.5</sub> | Winter             | GC-MS             | 31.6  | [123] |
| Italy  | urban site         | PM <sub>2.5</sub> | Spring             | GC-MS             | 1.3   | [123] |
| Italy  | rural back-ground  | PM <sub>2.5</sub> | Summer             | GC-MS             | <LOD  | [123] |
| Italy  | rural back-ground  | PM <sub>2.5</sub> | Autumn             | GC-MS             | 23.7  | [123] |
| Italy  | rural back-ground  | PM <sub>2.5</sub> | Winter             | GC-MS             | 32    | [123] |
| Italy  | rural back-ground  | PM <sub>2.5</sub> | Spring             | GC-MS             | <LOD  | [123] |
| Greece | rural coastal site | PM <sub>10</sub>  | yearly             | HPAEC-PAD         | 0.36  | [194] |
| Brazil | forest site        | PM <sub>2.5</sub> | Winter             | GC-MS             | 0.19  | [195] |
| Brazil | forest site        | PM <sub>10</sub>  | Winter             | GC-MS             | 0.12  | [195] |
| China  | forest background  | PM <sub>2.5</sub> | Summer (daytime)   | GC-MS             | -     | [56]  |
| China  | forest background  | PM <sub>2.5</sub> | Summer (nighttime) | GC-MS             | -     | [56]  |
| Brazil | urban site         | PM <sub>10</sub>  | Winter             | GC-MS             | 13.1  | [139] |
| Brazil | urban site         | PM <sub>10</sub>  | Winter             | GC-MS             | 16.7  | [139] |
| Japan  | marine site        | aerosol           | Winter             | GC-MS             | 0.054 | [178] |
| Japan  | marine site        | aerosol           | Spring             | GC-MS             | 0.036 | [178] |
| Japan  | marine site        | aerosol           | summer             | GC-MS             | 0.012 | [178] |
| Japan  | marine site        | aerosol           | autumn             | GC-MS             | 0.01  | [178] |
| Taiwan | urban area         | PM <sub>2.5</sub> | Autumn             | HPAEC-PAD         | 1.83  | [177] |

#### *Inositol (myo-inositol)*

|       |                   |                   |        |       |      |       |
|-------|-------------------|-------------------|--------|-------|------|-------|
| China | -                 | PM <sub>2.5</sub> | Summer | GC-MS | 1.7  | [55]  |
| China | urban back-ground | PM <sub>2.5</sub> | Autumn | GC-MS | 2.69 | [189] |
| China | urban back-ground | PM <sub>2.5</sub> | Winter | GC-MS | 3.95 | [189] |
| China | urban back-ground | PM <sub>2.5</sub> | Spring | GC-MS | 3.97 | [189] |

|        |                    |                   |                    |           |      |       |
|--------|--------------------|-------------------|--------------------|-----------|------|-------|
| China  | urban back-ground  | PM <sub>2.5</sub> | Summer             | GC-MS     | 1.29 | [189] |
| India  | urban back-ground  | PM <sub>10</sub>  | Spring             | GC-MS     | 3.32 | [190] |
| India  | rural back-ground  | PM <sub>1</sub>   | Autumn             | GC-MS     | 85.5 | [54]  |
| India  | rural back-ground  | PM <sub>2.5</sub> | Autumn             | IC-PAD    | 170  | [128] |
| China  | urban back-ground  | PM <sub>2.5</sub> | Spring             | HPAEC-PAD | 3.3  | [130] |
| China  | urban back-ground  | PM <sub>2.5</sub> | Summer             | HPAEC-PAD | 2    | [130] |
| China  | urban back-ground  | PM <sub>2.5</sub> | Autumn             | HPAEC-PAD | 6.9  | [130] |
| China  | urban back-ground  | PM <sub>2.5</sub> | Winter             | HPAEC-PAD | 2.8  | [130] |
| Brazil | pasture site       | aerosol           | Autumn             | GC-MS     | 2.9  | [53]  |
| Brazil | forest site        | aerosol           | Autumn             | GC-MS     | 1.8  | [53]  |
| Brazil | forest site        | PM <sub>2.5</sub> | Winter             | GC-MS     | 0.27 | [195] |
| Brazil | forest site        | PM <sub>10</sub>  | Winter             | GC-MS     | 2.85 | [195] |
| China  | forest background  | PM <sub>2.5</sub> | Summer (daytime)   | GC-MS     | -    | [56]  |
| China  | forest back-ground | PM <sub>2.5</sub> | Summer (nighttime) | GC-MS     | -    | [56]  |
| Japan  | marine site        | aerosol           | Winter             | GC-MS     | 0.03 | [178] |
| Japan  | marine site        | aerosol           | Spring             | GC-MS     | 0.06 | [178] |
| Japan  | marine site        | aerosol           | Summer             | GC-MS     | 0.06 | [178] |
| Japan  | marine site        | aerosol           | Autumn             | GC-MS     | 0.03 | [178] |
| Taiwan | urban area         | PM <sub>2.5</sub> | Autumn             | HPAEC-PAD | 3.43 | [177] |

*Arabitol*

|          |                   |                   |               |        |      |       |
|----------|-------------------|-------------------|---------------|--------|------|-------|
| Thailand | -                 | PM <sub>2.5</sub> | Winter-Spring | IC-PAD | 30   | [57]  |
| China    | urban back-ground | PM <sub>2.5</sub> | Autumn        | GC-MS  | 3.07 | [189] |
| China    | urban back-ground | PM <sub>2.5</sub> | Winter        | GC-MS  | 3.34 | [189] |
| China    | urban back-ground | PM <sub>2.5</sub> | Spring        | GC-MS  | 1.78 | [189] |
| China    | urban back-ground | PM <sub>2.5</sub> | Summer        | GC-MS  | 0.46 | [189] |
| India    | urban back-ground | PM <sub>10</sub>  | Spring        | GC-MS  | 8.09 | [190] |
| India    | rural back-ground | PM <sub>1</sub>   | Autumn        | GC-MS  | 20.8 | [54]  |
| India    | rural back-ground | PM <sub>2.5</sub> | Autumn        | IC-PAD | 174  | [128] |
| China    | urban back-ground | PM <sub>2.5</sub> | Autumn        | GC-MS  | 3.9  | [122] |
| China    | urban back-ground | PM <sub>2.5</sub> | Winter        | GC-MS  | 5.1  | [122] |
| China    | urban back-ground | PM <sub>2.5</sub> | Spring        | GC-MS  | 2.9  | [122] |

|                |                    |                   |                    |                   |       |       |
|----------------|--------------------|-------------------|--------------------|-------------------|-------|-------|
| China          | urban back-ground  | PM <sub>2.5</sub> | Summer             | GC-MS             | 4     | [122] |
| USA            | rural back-ground  | PM <sub>2.5</sub> | Autumn to Summer   | GC-MS             | 3.1   | [31]  |
| USA            | urban background   | PM <sub>2.5</sub> | Winter to Spring   | GC-MS             | 1.8   | [31]  |
| China          | urban background   | PM <sub>2.5</sub> | Spring             | HPAEC-PAD         | 10    | [130] |
| China          | urban back-ground  | PM <sub>2.5</sub> | Summer             | HPAEC-PAD         | 6.9   | [130] |
| China          | urban back-ground  | PM <sub>2.5</sub> | Autumn             | HPAEC-PAD         | 11    | [130] |
| China          | urban back-ground  | PM <sub>2.5</sub> | Winter             | HPAEC-PAD         | 6.6   | [130] |
| Brazil         | pasture site       | aerosol           | Autumn             | GC-MS             | 19.5  | [53]  |
| Brazil         | forest site        | aerosol           | Autumn             | GC-MS             | 19    | [53]  |
| Italy          | urban back-ground  | aerosol           | Spring             | IC-MS             | 6     | [192] |
| Arctic region  | rural back-ground  | PM <sub>10</sub>  | Spring             | IC-MS             | 0.8   | [193] |
| China          | rural back-ground  | PM <sub>10</sub>  | Autumn to Winter   | HPAEC-PAD         | 11.7  | [127] |
| Serbia         | urban back-ground  | aerosol           | Summer to Winter   | HPAEC-MS, HPLC-MS | 62.5  | [39]  |
| Brazil         | forest site        | PM <sub>2.5</sub> | Winter             | GC-MS             | 13.84 | [195] |
| Brazil         | forest site        | PM <sub>10</sub>  | Winter             | GC-MS             | 41.74 | [195] |
| China          | forest background  | PM <sub>2.5</sub> | Summer (daytime)   | GC-MS             | -     | [56]  |
| China          | forest back-ground | PM <sub>2.5</sub> | Summer (nighttime) | GC-MS             | -     | [56]  |
| Brazil         | urban site         | PM <sub>10</sub>  | Winter             | GC-MS             | 9.3   | [139] |
| Brazil         | urban site         | PM <sub>10</sub>  | Winter             | GC-MS             | 11.6  | [139] |
| Japan          | marine site        | aerosol           | Winter             | GC-MS             | 0.7   | [178] |
| Japan          | marine site        | aerosol           | Spring             | GC-MS             | 3.06  | [178] |
| Japan          | marine site        | aerosol           | summer             | GC-MS             | 3.08  | [178] |
| Japan          | marine site        | aerosol           | autumn             | GC-MS             | 1.68  | [178] |
| Czech Republic | suburban area      | aerosol           | Winter             | NMR               | -     | [197] |
| Czech Republic | suburban area      | aerosol           | Summer             | NMR               | -     | [197] |

#### Mannitol

|          |                   |                   |               |        |      |       |
|----------|-------------------|-------------------|---------------|--------|------|-------|
| Japan    | marine site       | aerosol           | Winter        | GC-MS  | 0.92 | [178] |
| Japan    | marine site       | aerosol           | Spring        | GC-MS  | 2.9  | [178] |
| Japan    | marine site       | aerosol           | Summer        | GC-MS  | 4    | [178] |
| Japan    | marine site       | aerosol           | Autumn        | GC-MS  | 2.07 | [178] |
| Thailand | -                 | PM <sub>2.5</sub> | Winter-Spring | IC-PAD | 12   | [57]  |
| China    | urban back-ground | PM <sub>2.5</sub> | Autumn        | GC-MS  | 3.28 | [189] |

|               |                   |                   |                  |                   |       |       |
|---------------|-------------------|-------------------|------------------|-------------------|-------|-------|
| China         | urban back-ground | PM <sub>2.5</sub> | Winter           | GC-MS             | 4.38  | [189] |
| China         | urban back-ground | PM <sub>2.5</sub> | Spring           | GC-MS             | 4.86  | [189] |
| China         | urban back-ground | PM <sub>2.5</sub> | Summer           | GC-MS             | 1.04  | [189] |
| China         | rural back-ground | PM <sub>2.5</sub> | Summer           | HPAEC-PAD         | 61.3  | [29]  |
| China         | urban back-ground | PM <sub>2.5</sub> | Summer           | HPAEC-PAD         | 12.98 | [29]  |
| India         | urban back-ground | PM <sub>10</sub>  | Spring           | GC-MS             | 10.3  | [190] |
| India         | rural back-ground | PM <sub>1</sub>   | Autumn           | GC-MS             | 968   | [54]  |
| India         | rural back-ground | PM <sub>2.5</sub> | Autumn           | IC-PAD            | 1623  | [128] |
| China         | urban back-ground | PM <sub>2.5</sub> | Autumn           | GC-MS             | 15.7  | [122] |
| China         | urban back-ground | PM <sub>2.5</sub> | Winter           | GC-MS             | 11.2  | [122] |
| China         | urban back-ground | PM <sub>2.5</sub> | Spring           | GC-MS             | 8.5   | [122] |
| China         | urban back-ground | PM <sub>2.5</sub> | Summer           | GC-MS             | 18.1  | [122] |
| USA           | rural back-ground | PM <sub>2.5</sub> | Autumn to Summer | GC-MS             | 3.8   | [31]  |
| USA           | urban background  | PM <sub>2.5</sub> | Winter to Spring | GC-MS             | 3.2   | [31]  |
| China         | urban background  | PM <sub>2.5</sub> | Spring           | HPAEC-PAD         | 15    | [130] |
| China         | urban back-ground | PM <sub>2.5</sub> | Summer           | HPAEC-PAD         | 21    | [130] |
| China         | urban back-ground | PM <sub>2.5</sub> | Autumn           | HPAEC-PAD         | 22    | [130] |
| China         | urban back-ground | PM <sub>2.5</sub> | Winter           | HPAEC-PAD         | 3.7   | [130] |
| Brazil        | pasture site      | aerosol           | Autumn           | GC-MS             | 26.3  | [53]  |
| Brazil        | forest site       | aerosol           | Autumn           | GC-MS             | 22.3  | [53]  |
| Italy         | urban back-ground | aerosol           | Spring           | IC-MS             | 7     | [192] |
| Arctic region | rural back-ground | PM <sub>10</sub>  | Spring           | IC-MS             | 0.7   | [193] |
| China         | rural back-ground | PM <sub>10</sub>  | Autumn to Winter | HPAEC-PAD         | 23.3  | [127] |
| Serbia        | urban back-ground | aerosol           | Summer to Winter | HPAEC-MS, HPLC-MS | 35.9  | [39]  |
| Italy         | urban site        | PM <sub>2.5</sub> | Summer           | GC-MS             | 3.1   | [123] |
| Italy         | urban site        | PM <sub>2.5</sub> | Autumn           | GC-MS             | 3.4   | [123] |
| Italy         | urban site        | PM <sub>2.5</sub> | Winter           | GC-MS             | <LOD  | [123] |
| Italy         | urban site        | PM <sub>2.5</sub> | Spring           | GC-MS             | 14.7  | [123] |
| Italy         | rural back-ground | PM <sub>2.5</sub> | Summer           | GC-MS             | 27    | [123] |



|                |                    |                   |                    |           |       |       |
|----------------|--------------------|-------------------|--------------------|-----------|-------|-------|
| Italy          | rural back-ground  | PM <sub>2.5</sub> | Autumn             | GC-MS     | 4.3   | [123] |
| Italy          | rural back-ground  | PM <sub>2.5</sub> | Winter             | GC-MS     | <LOD  | [123] |
| Italy          | rural back-ground  | PM <sub>2.5</sub> | Spring             | GC-MS     | 6.3   | [123] |
| Greece         | rural coastal site | PM <sub>10</sub>  | yearly             | HPAEC-PAD | 5.81  | [194] |
| Brazil         | forest site        | PM <sub>2.5</sub> | Winter             | GC-MS     | 15.17 | [195] |
| Brazil         | forest site        | PM <sub>10</sub>  | Winter             | GC-MS     | 53.3  | [195] |
| China          | forest background  | PM <sub>2.5</sub> | Summer (daytime)   | GC-MS     | -     | [56]  |
| China          | forest background  | PM <sub>2.5</sub> | Summer (nighttime) | GC-MS     | -     | [56]  |
| Brazil         | urban site         | PM <sub>10</sub>  | Winter             | GC-MS     | 11.3  | [139] |
| Brazil         | urban site         | PM <sub>10</sub>  | Winter             | GC-MS     | 14.8  | [139] |
| China          | urban area         | PM <sub>1</sub>   | Summer             | HPAEC-PAD | 9.8   | [196] |
| China          | urban area         | PM <sub>2.5</sub> | Summer             | HPAEC-PAD | 15.2  | [196] |
| Czech Republic | suburban area      | aerosol           | Winter             | NMR       | -     | [197] |
| Czech Republic | suburban area      | aerosol           | Summer             | NMR       | -     | [197] |

*Erythritol*

|          |                   |                   |               |        |      |       |
|----------|-------------------|-------------------|---------------|--------|------|-------|
| Japan    | -                 | aerosol           | winter        | GC-MS  | 0.21 | [178] |
| Japan    | -                 | aerosol           | Spring        | GC-MS  | 0.62 | [178] |
| Japan    | -                 | aerosol           | Summer        | GC-MS  | 1.22 | [178] |
| Japan    | -                 | aerosol           | Autumn        | GC-MS  | 0.51 | [178] |
| China    | -                 | PM <sub>2.5</sub> | Summer        | GC-MS  | 29.8 | [55]  |
| Thailand | -                 | PM <sub>2.5</sub> | Winter-Spring | IC-PAD | 32   | [57]  |
| China    | urban back-ground | PM <sub>2.5</sub> | Autumn        | GC-MS  | 4.64 | [189] |
| China    | urban back-ground | PM <sub>2.5</sub> | Winter        | GC-MS  | 6.13 | [189] |
| China    | urban back-ground | PM <sub>2.5</sub> | Spring        | GC-MS  | 1.69 | [189] |
| China    | urban back-ground | PM <sub>2.5</sub> | Summer        | GC-MS  | 0.52 | [189] |
| India    | rural back-ground | PM <sub>1</sub>   | Autumn        | GC-MS  | 34.1 | [54]  |
| India    | rural back-ground | PM <sub>2.5</sub> | Autumn        | IC-PAD | 135  | [128] |
| China    | urban back-ground | PM <sub>2.5</sub> | Autumn        | GC-MS  | 1.3  | [122] |
| China    | urban back-ground | PM <sub>2.5</sub> | Winter        | GC-MS  | 2.6  | [122] |
| China    | urban back-ground | PM <sub>2.5</sub> | Spring        | GC-MS  | 1.2  | [122] |

|        |                   |                   |                    |           |      |       |
|--------|-------------------|-------------------|--------------------|-----------|------|-------|
| China  | urban back-ground | PM <sub>2.5</sub> | Summer             | GC-MS     | 2.1  | [122] |
| USA    | rural back-ground | PM <sub>2.5</sub> | Autumn to Summer   | GC-MS     | 0.6  | [31]  |
| USA    | urban background  | PM <sub>2.5</sub> | Winter to Spring   | GC-MS     | 0.7  | [31]  |
| China  | urban background  | PM <sub>2.5</sub> | Spring             | HPAEC-PAD | 2.2  | [130] |
| China  | urban back-ground | PM <sub>2.5</sub> | Summer             | HPAEC-PAD | 2.1  | [130] |
| China  | urban back-ground | PM <sub>2.5</sub> | Autumn             | HPAEC-PAD | 4.7  | [55]  |
| China  | urban back-ground | PM <sub>2.5</sub> | Winter             | HPAEC-PAD | 2.9  | [130] |
| Brazil | pasture site      | aerosol           | Autumn             | GC-MS     | 15.9 | [53]  |
| Brazil | forest site       | aerosol           | Autumn             | GC-MS     | 13.6 | [53]  |
| Italy  | urban back-ground | aerosol           | Spring             | IC-MS     | 7    | [192] |
| Italy  | urban site        | PM <sub>2.5</sub> | Summer             | GC-MS     | <LOD | [123] |
| Italy  | urban site        | PM <sub>2.5</sub> | Autumn             | GC-MS     | 1.7  | [123] |
| Italy  | urban site        | PM <sub>2.5</sub> | Winter             | GC-MS     | 2.8  | [123] |
| Italy  | urban site        | PM <sub>2.5</sub> | Spring             | GC-MS     | <LOD | [123] |
| Italy  | rural back-ground | PM <sub>2.5</sub> | Summer             | GC-MS     | <LOD | [123] |
| Italy  | rural back-ground | PM <sub>2.5</sub> | Autumn             | GC-MS     | <LOD | [123] |
| Italy  | rural back-ground | PM <sub>2.5</sub> | Winter             | GC-MS     | 2.1  | [123] |
| Italy  | rural back-ground | PM <sub>2.5</sub> | Spring             | GC-MS     | <LOD | [123] |
| Brazil | forest site       | PM <sub>2.5</sub> | Winter             | GC-MS     | 0.54 | [195] |
| Brazil | forest site       | PM <sub>10</sub>  | Winter             | GC-MS     | 1.84 | [195] |
| China  | forest background | PM <sub>2.5</sub> | Summer (daytime)   | GC-MS     | -    | [56]  |
| China  | forest background | PM <sub>2.5</sub> | Summer (nighttime) | GC-MS     | -    | [56]  |
| Taiwan | urban area        | PM <sub>2.5</sub> | Autumn             | HPAEC-PAD | 0.14 | [177] |

*Sorbitol*

|       |                   |                   |                  |       |     |       |
|-------|-------------------|-------------------|------------------|-------|-----|-------|
| China | -                 | PM <sub>2.5</sub> | Summer           | GC-MS | 5.5 | [55]  |
| China | urban back-ground | PM <sub>2.5</sub> | Autumn           | GC-MS | 0.6 | [122] |
| China | urban back-ground | PM <sub>2.5</sub> | Winter           | GC-MS | 0.7 | [122] |
| China | urban back-ground | PM <sub>2.5</sub> | Spring           | GC-MS | 0.6 | [122] |
| China | urban back-ground | PM <sub>2.5</sub> | Summer           | GC-MS | 0.7 | [122] |
| USA   | rural back-ground | PM <sub>2.5</sub> | Autumn to Summer | GC-MS | 0.6 | [31]  |
| USA   | urban background  | PM <sub>2.5</sub> | Winter to Spring | GC-MS | 0.4 | [31]  |

|                |                    |                  |        |           |      |       |
|----------------|--------------------|------------------|--------|-----------|------|-------|
| Brazil         | pasture site       | aerosol          | Autumn | GC-MS     | 0.8  | [53]  |
| Brazil         | forest site        | aerosol          | Autumn | GC-MS     | 1.2  | [53]  |
| Greece         | rural coastal site | PM <sub>10</sub> | yearly | HPAEC-PAD | 0.72 | [194] |
| Czech Republic | suburban area      | aerosol          | Winter | NMR       | -    | [197] |
| Czech Republic | suburban area      | aerosol          | Summer | NMR       | -    | [197] |

*Glycerol*

|        |                    |                   |                    |           |       |       |
|--------|--------------------|-------------------|--------------------|-----------|-------|-------|
| China  | -                  | PM <sub>2.5</sub> | Summer             | GC-MS     | 5.7   | [55]  |
| China  | urban back-ground  | PM <sub>2.5</sub> | Autumn             | GC-MS     | 35.5  | [189] |
| China  | urban back-ground  | PM <sub>2.5</sub> | Winter             | GC-MS     | 35.6  | [189] |
| China  | urban back-ground  | PM <sub>2.5</sub> | Spring             | GC-MS     | 9.07  | [189] |
| China  | urban back-ground  | PM <sub>2.5</sub> | Summer             | GC-MS     | 5.84  | [189] |
| China  | rural back-ground  | PM <sub>2.5</sub> | Summer             | HPAEC-PAD | 75.58 | [29]  |
| China  | urban back-ground  | PM <sub>2.5</sub> | Summer             | HPAEC-PAD | 46.97 | [29]  |
| India  | rural back-ground  | PM <sub>1</sub>   | Autumn             | GC-MS     | 32.7  | [54]  |
| India  | rural back-ground  | PM <sub>2.5</sub> | Autumn             | IC-PAD    | 69.4  | [128] |
| China  | urban back-ground  | PM <sub>2.5</sub> | Autumn             | GC-MS     | 13.6  | [122] |
| China  | urban back-ground  | PM <sub>2.5</sub> | Winter             | GC-MS     | 22.3  | [122] |
| China  | urban back-ground  | PM <sub>2.5</sub> | Spring             | GC-MS     | 12.3  | [122] |
| China  | urban back-ground  | PM <sub>2.5</sub> | Summer             | GC-MS     | 11.2  | [122] |
| USA    | rural back-ground  | PM <sub>2.5</sub> | Autumn to Summer   | GC-MS     | 5.7   | [31]  |
| USA    | urban back-ground  | PM <sub>2.5</sub> | Winter to Spring   | GC-MS     | 3.7   | [31]  |
| Brazil | pasture site       | aerosol           | Autumn             | GC-MS     | 8.2   | [53]  |
| Brazil | forest site        | aerosol           | Autumn             | GC-MS     | 5     | [53]  |
| Brazil | forest site        | PM <sub>2.5</sub> | Winter             | GC-MS     | 0.29  | [195] |
| Brazil | forest site        | PM <sub>10</sub>  | Winter             | GC-MS     | 2.06  | [195] |
| China  | forest background  | PM <sub>2.5</sub> | Summer (daytime)   | GC-MS     | 11.8  | [56]  |
| China  | forest background  | PM <sub>2.5</sub> | Summer (nighttime) | GC-MS     | 8.52  | [56]  |
| China  | forest back-ground | PM <sub>2.5</sub> | Summer (daytime)   | GC-MS     | -     | [56]  |
| China  | forest back-ground | PM <sub>2.5</sub> | Summer (nighttime) | GC-MS     | -     | [56]  |
| Taiwan | urban area         | PM <sub>2.5</sub> | Autumn             | HPAEC-PAD | 5.46  | [177] |

|                 |                |                    |                   |                  |           |       |       |
|-----------------|----------------|--------------------|-------------------|------------------|-----------|-------|-------|
|                 | Czech Republic | suburban area      | aerosol           | Winter           | NMR       | -     | [197] |
|                 | Czech Republic | suburban area      | aerosol           | Summer           | NMR       | -     | [197] |
| <i>Xylitol</i>  |                |                    |                   |                  |           |       |       |
|                 | India          | rural back-ground  | PM <sub>1</sub>   | Autumn           | GC-MS     | 148   | [54]  |
|                 | India          | rural back-ground  | PM <sub>2.5</sub> | Autumn           | IC-PAD    | 627   | [128] |
|                 | China          | urban back-ground  | PM <sub>2.5</sub> | Autumn           | GC-MS     | 0.2   | [122] |
|                 | China          | urban back-ground  | PM <sub>2.5</sub> | Winter           | GC-MS     | 0.3   | [122] |
|                 | China          | urban back-ground  | PM <sub>2.5</sub> | Spring           | GC-MS     | 0.2   | [122] |
|                 | China          | urban back-ground  | PM <sub>2.5</sub> | Summer           | GC-MS     | 0.2   | [122] |
|                 | Greece         | rural coastal site | PM <sub>10</sub>  | yearly           | HPAEC-PAD | 0.92  | [194] |
|                 | Taiwan         | urban area         | PM <sub>2.5</sub> | Autumn           | HPAEC-PAD | 3.7   | [177] |
| <i>Ribitol</i>  |                |                    |                   |                  |           |       |       |
|                 | USA            | rural back-ground  | PM <sub>2.5</sub> | Autumn to Summer | GC-MS     | 0.5   | [31]  |
|                 | USA            | urban background   | PM <sub>2.5</sub> | Winter to Spring | GC-MS     | 0.1   | [31]  |
|                 | Italy          | urban site         | PM <sub>2.5</sub> | Summer           | GC-MS     | 4     | [123] |
|                 | Italy          | urban site         | PM <sub>2.5</sub> | Autumn           | GC-MS     | <LOD  | [123] |
|                 | Italy          | urban site         | PM <sub>2.5</sub> | Winter           | GC-MS     | <LOD  | [123] |
|                 | Italy          | urban site         | PM <sub>2.5</sub> | Spring           | GC-MS     | <LOD  | [123] |
|                 | Italy          | rural back-ground  | PM <sub>2.5</sub> | Summer           | GC-MS     | 4.3   | [123] |
|                 | Italy          | rural back-ground  | PM <sub>2.5</sub> | Autumn           | GC-MS     | <LOD  | [123] |
|                 | Italy          | rural back-ground  | PM <sub>2.5</sub> | Winter           | GC-MS     | <LOD  | [123] |
|                 | Italy          | rural back-ground  | PM <sub>2.5</sub> | Spring           | GC-MS     | <LOD  | [123] |
| <i>Threitol</i> |                |                    |                   |                  |           |       |       |
|                 | China          | rural back-ground  | PM <sub>2.5</sub> | Summer           | HPAEC-PAD | 10.47 | [29]  |
|                 | China          | urban back-ground  | PM <sub>2.5</sub> | Summer           | HPAEC-PAD | 6.12  | [29]  |
|                 | Brazil         | pasture site       | aerosol           | Autumn           | GC-MS     | 2.3   | [53]  |
|                 | Brazil         | forest site        | aerosol           | Autumn           | GC-MS     | 1.7   | [53]  |
|                 | China          | rural back-ground  | PM <sub>10</sub>  | Autumn to Winter | HPAEC-PAD | 8.4   | [127] |

|                                                  |          |                   |                   |                  |                   |       |       |
|--------------------------------------------------|----------|-------------------|-------------------|------------------|-------------------|-------|-------|
| <i>Methyltetrols<br/>(2-methyl<br/>threitol)</i> |          |                   |                   |                  |                   |       |       |
|                                                  | China    | rural back-ground | PM <sub>2.5</sub> | Summer           | HPAEC-PAD         | 12.87 | [29]  |
|                                                  | China    | urban back-ground | PM <sub>2.5</sub> | Summer           | HPAEC-PAD         | 11.25 | [29]  |
| <i>Glucose</i>                                   |          |                   |                   |                  |                   |       |       |
|                                                  | Thailand | -                 | PM <sub>2.5</sub> | Winter-Spring    | IC-PAD            | 32    | [57]  |
|                                                  | China    | urban back-ground | PM <sub>2.5</sub> | Autumn           | GC-MS             | 5.02  | [189] |
|                                                  | China    | urban back-ground | PM <sub>2.5</sub> | Winter           | GC-MS             | 16    | [189] |
|                                                  | China    | urban back-ground | PM <sub>2.5</sub> | Spring           | GC-MS             | 19.5  | [189] |
|                                                  | China    | urban back-ground | PM <sub>2.5</sub> | Summer           | GC-MS             | 2.84  | [189] |
|                                                  | India    | urban back-ground | PM <sub>2.5</sub> | Spring           | GC-MS             | 13.77 | [190] |
|                                                  | India    | rural back-ground | PM <sub>2.5</sub> | Autumn           | IC-PAD            | 2975  | [128] |
|                                                  | China    | urban back-ground | PM <sub>2.5</sub> | Autumn           | GC-MS             | 4.8   | [122] |
|                                                  | China    | urban back-ground | PM <sub>2.5</sub> | Winter           | GC-MS             | 3.6   | [122] |
|                                                  | China    | urban back-ground | PM <sub>2.5</sub> | Spring           | GC-MS             | 3.4   | [122] |
|                                                  | China    | urban back-ground | PM <sub>2.5</sub> | Summer           | GC-MS             | 2.8   | [122] |
|                                                  | USA      | rural back-ground | PM <sub>2.5</sub> | Autumn to Summer | GC-MS             | 10.2  | [31]  |
|                                                  | USA      | urban background  | PM <sub>2.5</sub> | Winter to Spring | GC-MS             | 8     | [31]  |
|                                                  | Brazil   | pasture site      | aerosol           | Autumn           | GC-MS             | 36.7  | [53]  |
|                                                  | Brazil   | forest site       | aerosol           | Autumn           | GC-MS             | 20.1  | [53]  |
|                                                  | Italy    | urban back-ground | aerosol           | Spring           | IC-MS             | 21    | [192] |
|                                                  | Serbia   | urban back-ground | aerosol           | Summer to Winter | HPAEC-MS, HPLC-MS | 21.6  | [39]  |
|                                                  | Italy    | urban site        | PM <sub>2.5</sub> | Summer           | GC-MS             | 0.9   | [123] |
|                                                  | Italy    | urban site        | PM <sub>2.5</sub> | Autumn           | GC-MS             | 6.9   | [123] |
|                                                  | Italy    | urban site        | PM <sub>2.5</sub> | Winter           | GC-MS             | 5.6   | [123] |
|                                                  | Italy    | urban site        | PM <sub>2.5</sub> | Spring           | GC-MS             | 6.7   | [123] |
|                                                  | Italy    | rural back-ground | PM <sub>2.5</sub> | Summer           | GC-MS             | 3.3   | [123] |
|                                                  | Italy    | rural back-ground | PM <sub>2.5</sub> | Autumn           | GC-MS             | 4.9   | [123] |
|                                                  | Italy    | rural back-ground | PM <sub>2.5</sub> | Winter           | GC-MS             | 5.4   | [123] |
|                                                  | Italy    | rural back-ground | PM <sub>2.5</sub> | Spring           | GC-MS             | 7.3   | [123] |

|                |                    |                   |                    |           |       |       |
|----------------|--------------------|-------------------|--------------------|-----------|-------|-------|
| Greece         | rural coastal site | PM <sub>10</sub>  | yearly             | HPAEC-PAD | 13.5  | [194] |
| Brazil         | forest site        | PM <sub>2.5</sub> | Winter             | GC-MS     | 7.86  | [195] |
| Brazil         | forest site        | PM <sub>10</sub>  | Winter             | GC-MS     | 47.95 | [195] |
| China          | forest background  | PM <sub>2.5</sub> | Summer (daytime)   | GC-MS     | 16.2  | [56]  |
| China          | forest background  | PM <sub>2.5</sub> | Summer (nighttime) | GC-MS     | 4.79  | [56]  |
| Brazil         | urban site         | PM <sub>10</sub>  | Winter             | GC-MS     | 33    | [139] |
| Brazil         | urban site         | PM <sub>10</sub>  | Winter             | GC-MS     | 31    | [139] |
| Japan          | marine site        | aerosol           | Winter             | GC-MS     | 1.99  | [178] |
| Japan          | marine site        | aerosol           | Spring             | GC-MS     | 5.47  | [178] |
| Japan          | marine site        | aerosol           | Summer             | GC-MS     | 5.6   | [178] |
| Japan          | marine site        | aerosol           | Autumn             | GC-MS     | 1.69  | [178] |
| China          | urban area         | PM <sub>1</sub>   | Summer             | HPAEC-PAD | -     | [196] |
| China          | urban area         | PM <sub>2.5</sub> | Summer             | HPAEC-PAD | 14.6  | [196] |
| Czech Republic | suburban area      | aerosol           | Winter             | NMR       | -     | [197] |
| Czech Republic | suburban area      | aerosol           | Summer             | NMR       | -     | [197] |

*Fructose*

|        |                   |                   |        |           |       |       |
|--------|-------------------|-------------------|--------|-----------|-------|-------|
| China  | -                 | PM <sub>2.5</sub> | Summer | GC-MS     | 2.2   | [55]  |
| China  | urban back-ground | PM <sub>2.5</sub> | Autumn | GC-MS     | 2.18  | [189] |
| China  | urban back-ground | PM <sub>2.5</sub> | Winter | GC-MS     | 6.18  | [189] |
| China  | urban back-ground | PM <sub>2.5</sub> | Spring | GC-MS     | 3.19  | [189] |
| China  | urban back-ground | PM <sub>2.5</sub> | Summer | GC-MS     | 1.58  | [189] |
| India  | urban back-ground | PM <sub>2.5</sub> | Spring | GC-MS     | 19.43 | [190] |
| China  | urban back-ground | PM <sub>2.5</sub> | Autumn | GC-MS     | 15.3  | [122] |
| China  | urban back-ground | PM <sub>2.5</sub> | Winter | GC-MS     | 15.2  | [122] |
| China  | urban back-ground | PM <sub>2.5</sub> | Spring | GC-MS     | 28.3  | [122] |
| China  | urban back-ground | PM <sub>2.5</sub> | Summer | GC-MS     | 19.6  | [122] |
| China  | urban back-ground | PM <sub>2.5</sub> | Spring | HPAEC-PAD | 33    | [130] |
| China  | urban back-ground | PM <sub>2.5</sub> | Summer | HPAEC-PAD | 26    | [130] |
| China  | urban back-ground | PM <sub>2.5</sub> | Autumn | HPAEC-PAD | 20    | [130] |
| China  | urban back-ground | PM <sub>2.5</sub> | Winter | HPAEC-PAD | 8.2   | [130] |
| Brazil | pasture site      | aerosol           | Autumn | GC-MS     | 8.9   | [53]  |
| Brazil | forest site       | aerosol           | Autumn | GC-MS     | 10.1  | [53]  |

|                |                    |                   |                    |                   |      |       |
|----------------|--------------------|-------------------|--------------------|-------------------|------|-------|
| Italy          | urban back-ground  | aerosol           | Spring             | IC-MS             | 4    | [192] |
| Serbia         | urban back-ground  | aerosol           | Summer to Winter   | HPAEC-MS, HPLC-MS | 83.6 | [39]  |
| Greece         | rural coastal site | PM <sub>10</sub>  | yearly             | HPAEC-PAD         | 10.4 | [194] |
| Brazil         | forest site        | PM <sub>2.5</sub> | Winter             | GC-MS             | 4.75 | [195] |
| Brazil         | forest site        | PM <sub>10</sub>  | Winter             | GC-MS             | 28.7 | [195] |
| China          | forest background  | PM <sub>2.5</sub> | Summer (daytime)   | GC-MS             | 8.7  | [56]  |
| China          | forest background  | PM <sub>2.5</sub> | Summer (nighttime) | GC-MS             | 1.74 | [56]  |
| Brazil         | urban site         | PM <sub>10</sub>  | Winter             | GC-MS             | 27   | [139] |
| Brazil         | urban site         | PM <sub>10</sub>  | Winter             | GC-MS             | 23   | [139] |
| Japan          | marine site        | aerosol           | Winter             | GC-MS             | 1.44 | [178] |
| Japan          | marine site        | aerosol           | Spring             | GC-MS             | 2.81 | [178] |
| Japan          | marine site        | aerosol           | Summer             | GC-MS             | 273  | [178] |
| Japan          | marine site        | aerosol           | Autumn             | GC-MS             | 0.62 | [178] |
| Czech Republic | suburban area      | aerosol           | Winter             | NMR               | -    | [197] |
| Czech Republic | suburban area      | aerosol           | Summer             | NMR               | -    | [197] |

*Mannose*

|          |                   |                   |               |           |      |       |
|----------|-------------------|-------------------|---------------|-----------|------|-------|
| Thailand | -                 | PM <sub>2.5</sub> | Winter-Spring | IC-PAD    | 33   | [57]  |
| India    | rural back-ground | PM <sub>2.5</sub> | Autumn        | IC-PAD    | 290  | [128] |
| China    | urban back-ground | PM <sub>2.5</sub> | Autumn        | GC-MS     | 1.9  | [122] |
| China    | urban back-ground | PM <sub>2.5</sub> | Winter        | GC-MS     | 2.1  | [122] |
| China    | urban back-ground | PM <sub>2.5</sub> | Spring        | GC-MS     | 2    | [122] |
| China    | urban back-ground | PM <sub>2.5</sub> | Summer        | GC-MS     | 2.1  | [122] |
| China    | urban back-ground | PM <sub>2.5</sub> | Spring        | HPAEC-PAD | 1    | [130] |
| China    | urban back-ground | PM <sub>2.5</sub> | Summer        | HPAEC-PAD | 0.4  | [130] |
| China    | urban background  | PM <sub>2.5</sub> | Autumn        | HPAEC-PAD | 0.8  | [130] |
| China    | urban back-ground | PM <sub>2.5</sub> | Winter        | HPAEC-PAD | -    | [130] |
| Brazil   | pasture site      | aerosol           | Autumn        | GC-MS     | 2.1  | [53]  |
| Brazil   | forest site       | aerosol           | Autumn        | GC-MS     | 1.6  | [53]  |
| Italy    | urban back-ground | aerosol           | Spring        | IC-MS     | 0.6  | [192] |
| Italy    | urban site        | PM <sub>2.5</sub> | Summer        | GC-MS     | <LOD | [123] |
| Italy    | urban site        | PM <sub>2.5</sub> | Autumn        | GC-MS     | <LOD | [123] |

|        |                    |                   |        |           |      |       |
|--------|--------------------|-------------------|--------|-----------|------|-------|
| Italy  | urban site         | PM <sub>2.5</sub> | Winter | GC-MS     | <LOD | [123] |
| Italy  | urban site         | PM <sub>2.5</sub> | Spring | GC-MS     | 4    | [123] |
| Italy  | rural back-ground  | PM <sub>2.5</sub> | Summer | GC-MS     | <LOD | [123] |
| Italy  | rural back-ground  | PM <sub>2.5</sub> | Autumn | GC-MS     | <LOD | [123] |
| Italy  | rural back-ground  | PM <sub>2.5</sub> | Winter | GC-MS     | <LOD | [123] |
| Italy  | rural back-ground  | PM <sub>2.5</sub> | Spring | GC-MS     | 4    | [123] |
| Greece | rural coastal site | PM <sub>10</sub>  | yearly | HPAEC-PAD | 1.71 | [194] |

*Threalose*

|        |                   |                   |                    |        |       |       |
|--------|-------------------|-------------------|--------------------|--------|-------|-------|
| Japan  | marine site       | aerosol           | winter             | GC-MS  | 0.47  | [178] |
| Japan  | marine site       | aerosol           | Spring             | GC-MS  | 0.99  | [178] |
| Japan  | marine site       | aerosol           | Summer             | GC-MS  | 1.2   | [178] |
| Japan  | marine site       | aerosol           | Autumn             | GC-MS  | 0.27  | [178] |
| China  | -                 | PM <sub>2.5</sub> | Summer             | GC-MS  | 3.9   | [55]  |
| China  | urban back-ground | PM <sub>2.5</sub> | Autumn             | GC-MS  | 0.94  | [189] |
| China  | urban back-ground | PM <sub>2.5</sub> | Winter             | GC-MS  | 7.45  | [189] |
| China  | urban back-ground | PM <sub>2.5</sub> | Spring             | GC-MS  | 8.38  | [189] |
| China  | urban back-ground | PM <sub>2.5</sub> | Summer             | GC-MS  | 1.09  | [189] |
| India  | urban back-ground | PM <sub>2.5</sub> | Spring             | GC-MS  | 28.87 | [190] |
| India  | rural back-ground | PM <sub>2.5</sub> | Autumn             | IC-PAD | 820   | [128] |
| China  | urban back-ground | PM <sub>2.5</sub> | Autumn             | GC-MS  | 2.4   | [122] |
| China  | urban back-ground | PM <sub>2.5</sub> | Winter             | GC-MS  | 2     | [122] |
| China  | urban back-ground | PM <sub>2.5</sub> | Spring             | GC-MS  | 2.4   | [122] |
| China  | urban back-ground | PM <sub>2.5</sub> | Summer             | GC-MS  | 3.5   | [122] |
| USA    | rural back-ground | PM <sub>2.5</sub> | Autumn to Summer   | GC-MS  | 0.9   | [31]  |
| USA    | urban background  | PM <sub>2.5</sub> | Winter to Spring   | GC-MS  | 0.5   | [31]  |
| Brazil | pasture site      | aerosol           | Autumn             | GC-MS  | 8.9   | [53]  |
| Brazil | forest site       | aerosol           | Autumn             | GC-MS  | 8.7   | [53]  |
| Brazil | forest site       | PM <sub>2.5</sub> | Winter             | GC-MS  | 6.88  | [195] |
| Brazil | forest site       | PM <sub>10</sub>  | Winter             | GC-MS  | 48.07 | [195] |
| China  | forest background | PM <sub>2.5</sub> | Summer (daytime)   | GC-MS  | -     | [56]  |
| China  | forest background | PM <sub>2.5</sub> | Summer (nighttime) | GC-MS  | -     | [56]  |



|                  |                |                    |                   |                  |                   |      |       |
|------------------|----------------|--------------------|-------------------|------------------|-------------------|------|-------|
|                  | Czech Republic | suburban area      | aerosol           | Winter           | NMR               | -    | [197] |
|                  | Czech Republic | suburban area      | aerosol           | Summer           | NMR               | -    | [197] |
| <i>Galactose</i> |                |                    |                   |                  |                   |      |       |
|                  | India          | rural background   | PM <sub>2.5</sub> | Autumn           | IC-PAD            | 400  | [128] |
|                  | Brazil         | pasture site       | aerosol           | Autumn           | GC-MS             | 0.9  | [53]  |
|                  | Brazil         | forest site        | aerosol           | Autumn           | GC-MS             | 0.6  | [53]  |
|                  | Serbia         | urban back-ground  | aerosol           | Summer to Winter | HPAEC-MS, HPLC-MS | 8.6  | [39]  |
|                  | Italy          | urban site         | PM <sub>2.5</sub> | Summer           | GC-MS             | <LOD | [123] |
|                  | Italy          | urban site         | PM <sub>2.5</sub> | Autumn           | GC-MS             | 2.8  | [123] |
|                  | Italy          | urban site         | PM <sub>2.5</sub> | Winter           | GC-MS             | 3    | [123] |
|                  | Italy          | urban site         | PM <sub>2.5</sub> | Spring           | GC-MS             | 1.2  | [123] |
|                  | Italy          | rural back-ground  | PM <sub>2.5</sub> | Summer           | GC-MS             | <LOD | [123] |
|                  | Italy          | rural back-ground  | PM <sub>2.5</sub> | Autumn           | GC-MS             | 2.6  | [123] |
|                  | Italy          | rural back-ground  | PM <sub>2.5</sub> | Winter           | GC-MS             | 3.1  | [123] |
|                  | Italy          | rural back-ground  | PM <sub>2.5</sub> | Spring           | GC-MS             | <LOD | [123] |
|                  | Greece         | rural coastal site | PM <sub>10</sub>  | yearly           | HPAEC-PAD         | 0.91 | [194] |
|                  | Taiwan         | urban area         | PM <sub>2.5</sub> | Autumn           | HPAEC-PAD         | 0.34 | [177] |
| <i>Arabinose</i> |                |                    |                   |                  |                   |      |       |
|                  | Italy          | urban back-ground  | aerosol           | Spring           | IC-MS             | 0.4  | [192] |
|                  | Arctic region  | rural back-ground  | PM <sub>10</sub>  | Spring           | IC-MS             | 0.7  | [193] |
|                  | Italy          | urban site         | PM <sub>2.5</sub> | Summer           | GC-MS             | <LOD | [123] |
|                  | Italy          | urban site         | PM <sub>2.5</sub> | Autumn           | GC-MS             | 2.4  | [123] |
|                  | Italy          | urban site         | PM <sub>2.5</sub> | Winter           | GC-MS             | 9.5  | [123] |
|                  | Italy          | urban site         | PM <sub>2.5</sub> | Spring           | GC-MS             | <LOD | [123] |
|                  | Italy          | rural back-ground  | PM <sub>2.5</sub> | Summer           | GC-MS             | <LOD | [123] |
|                  | Italy          | rural back-ground  | PM <sub>2.5</sub> | Autumn           | GC-MS             | <LOD | [123] |
|                  | Italy          | rural back-ground  | PM <sub>2.5</sub> | Winter           | GC-MS             | 8.9  | [123] |
|                  | Italy          | rural back-ground  | PM <sub>2.5</sub> | Spring           | GC-MS             | <LOD | [123] |
|                  | Greece         | rural coastal site | PM <sub>10</sub>  | yearly           | HPAEC-PAD         | 1.37 | [194] |

|                      |                |                    |                   |                    |        |       |       |
|----------------------|----------------|--------------------|-------------------|--------------------|--------|-------|-------|
| <i>Mannopyranose</i> | India          | rural back-ground  | PM <sub>2.5</sub> | Autumn             | IC-PAD | 625   | [128] |
| <i>Xylose</i>        | China          | urban back-ground  | PM <sub>2.5</sub> | Autumn             | GC-MS  | 8.96  | [189] |
|                      | China          | urban back-ground  | PM <sub>2.5</sub> | Winter             | GC-MS  | 10.2  | [189] |
|                      | China          | urban back-ground  | PM <sub>2.5</sub> | Spring             | GC-MS  | 2.34  | [189] |
|                      | China          | urban back-ground  | PM <sub>2.5</sub> | Summer             | GC-MS  | 0.78  | [189] |
|                      | China          | urban back-ground  | PM <sub>2.5</sub> | Autumn             | GC-MS  | 1.6   | [122] |
|                      | China          | urban back-ground  | PM <sub>2.5</sub> | Winter             | GC-MS  | 4.2   | [122] |
|                      | China          | urban back-ground  | PM <sub>2.5</sub> | Spring             | GC-MS  | 1.7   | [122] |
|                      | China          | urban back-ground  | PM <sub>2.5</sub> | Summer             | GC-MS  | 0.8   | [122] |
|                      | Brazil         | pasture site       | aerosol           | Autumn             | GC-MS  | 12.7  | [53]  |
|                      | Brazil         | forest site        | aerosol           | Autumn             | GC-MS  | 7.3   | [53]  |
|                      | China          | forest back-ground | PM <sub>2.5</sub> | Summer (daytime)   | GC-MS  | -     | [56]  |
|                      | China          | forest back-ground | PM <sub>2.5</sub> | Summer (nighttime) | GC-MS  | -     | [56]  |
|                      | Japan          | marine site        | aerosol           | Winter             | GC-MS  | 0.19  | [178] |
|                      | Japan          | marine site        | aerosol           | Spring             | GC-MS  | 0.19  | [178] |
|                      | Japan          | marine site        | aerosol           | Summer             | GC-MS  | 0.14  | [178] |
|                      | Japan          | marine site        | aerosol           | Autumn             | GC-MS  | 0.06  | [178] |
|                      | Czech Republic | suburban area      | aerosol           | Winter             | NMR    | -     | [197] |
|                      | Czech Republic | suburban area      | aerosol           | Summer             | NMR    | -     | [197] |
| <i>Sucrose</i>       | China          | -                  | PM <sub>2.5</sub> | Summer             | GC-MS  | 8.6   | [55]  |
|                      | China          | urban back-ground  | PM <sub>2.5</sub> | Autumn             | GC-MS  | 0.11  | [189] |
|                      | China          | urban back-ground  | PM <sub>2.5</sub> | Winter             | GC-MS  | 1.65  | [189] |
|                      | China          | urban back-ground  | PM <sub>2.5</sub> | Spring             | GC-MS  | 0.47  | [189] |
|                      | China          | urban back-ground  | PM <sub>2.5</sub> | Summer             | GC-MS  | 0.34  | [189] |
|                      | India          | urban back-ground  | PM <sub>2.5</sub> | Spring             | GC-MS  | 75.24 | [190] |
|                      | China          | urban back-ground  | PM <sub>2.5</sub> | Autumn             | GC-MS  | 15    | [122] |
|                      | China          | urban back-ground  | PM <sub>2.5</sub> | Winter             | GC-MS  | 4.7   | [122] |

|                |                    |                   |                    |                   |       |       |
|----------------|--------------------|-------------------|--------------------|-------------------|-------|-------|
| China          | urban back-ground  | PM <sub>2.5</sub> | Spring             | GC-MS             | 18.5  | [122] |
| China          | urban back-ground  | PM <sub>2.5</sub> | Summer             | GC-MS             | 29.8  | [122] |
| USA            | rural back-ground  | PM <sub>2.5</sub> | Autumn to Summer   | GC-MS             | 0.9   | [31]  |
| USA            | urban background   | PM <sub>2.5</sub> | Winter to Spring   | GC-MS             | 0.5   | [31]  |
| Brazil         | pasture site       | aerosol           | Autumn             | GC-MS             | 7.2   | [53]  |
| Brazil         | forest site        | aerosol           | Autumn             | GC-MS             | 14.6  | [53]  |
| Italy          | urban back-ground  | aerosol           | Spring             | IC-MS             | 25    | [192] |
| Serbia         | urban back-ground  | aerosol           | Summer to Winter   | HPAEC-MS, HPLC-MS | 10.8  | [39]  |
| Italy          | urban site         | PM <sub>2.5</sub> | Summer             | GC-MS             | <LOD  | [123] |
| Italy          | urban site         | PM <sub>2.5</sub> | Autumn             | GC-MS             | 4.6   | [123] |
| Italy          | urban site         | PM <sub>2.5</sub> | Winter             | GC-MS             | 3.1   | [123] |
| Italy          | urban site         | PM <sub>2.5</sub> | Spring             | GC-MS             | 1.7   | [123] |
| Italy          | rural back-ground  | PM <sub>2.5</sub> | Summer             | GC-MS             | <LOD  | [123] |
| Italy          | rural back-ground  | PM <sub>2.5</sub> | Autumn             | GC-MS             | 6.2   | [123] |
| Italy          | rural back-ground  | PM <sub>2.5</sub> | Winter             | GC-MS             | 2.6   | [123] |
| Italy          | rural back-ground  | PM <sub>2.5</sub> | Spring             | GC-MS             | <LOD  | [123] |
| Greece         | rural coastal site | PM <sub>10</sub>  | yearly             | HPAEC-PAD         | 8.44  | [194] |
| Brazil         | forest site        | PM <sub>2.5</sub> | Winter             | GC-MS             | 1.45  | [195] |
| Brazil         | forest site        | PM <sub>10</sub>  | Winter             | GC-MS             | 36.95 | [195] |
| China          | forest background  | PM <sub>2.5</sub> | Summer (daytime)   | GC-MS             | -     | [56]  |
| China          | forest back-ground | PM <sub>2.5</sub> | Summer (nighttime) | GC-MS             | -     | [56]  |
| Japan          | marine site        | aerosol           | Winter             | GC-MS             | 2.67  | [178] |
| Japan          | marine site        | aerosol           | Spring             | GC-MS             | 1.66  | [178] |
| Japan          | marine site        | aerosol           | Summer             | GC-MS             | 0.89  | [178] |
| Japan          | marine site        | aerosol           | Autumn             | GC-MS             | 0.24  | [178] |
| Czech Republic | suburban area      | aerosol           | Winter             | NMR               | -     | [197] |
| Czech Republic | suburban area      | aerosol           | Summer             | NMR               | -     | [197] |

*Maltose*

|       |                   |                   |        |       |     |       |
|-------|-------------------|-------------------|--------|-------|-----|-------|
| China | urban back-ground | PM <sub>2.5</sub> | Autumn | GC-MS | 1   | [122] |
| China | urban back-ground | PM <sub>2.5</sub> | Winter | GC-MS | 1.6 | [122] |
| China | urban back-ground | PM <sub>2.5</sub> | Spring | GC-MS | 1.3 | [122] |

|                      |       |                    |                   |                    |       |      |       |
|----------------------|-------|--------------------|-------------------|--------------------|-------|------|-------|
|                      | China | urban back-ground  | PM <sub>2.5</sub> | Summer             | GC-MS | 1.6  | [122] |
|                      | China | forest back-ground | PM <sub>2.5</sub> | Summer (daytime)   | GC-MS | -    | [56]  |
|                      | China | forest back-ground | PM <sub>2.5</sub> | Summer (nighttime) | GC-MS | -    | [56]  |
| <i>Glucopyranose</i> | China | -                  | PM <sub>2.5</sub> | Summer             | GC-MS | 11.8 | [55]  |

Note: “LOD” = limit of detection; “-” = not available.
